# Supplementary material
Source: publisher site journal article supplement (https://www.spandidos-publications.com/2417/downloadSupplementary)

Figure S1. Determining bLf purity. Analysis of bLf under reducing conditions via 10% SDS-PAGE and staining with Coomassie blue solution confirmed the presence of a single 80 kDa band. bLf, bovine lactoferrin; MWM, molecular weight marker.

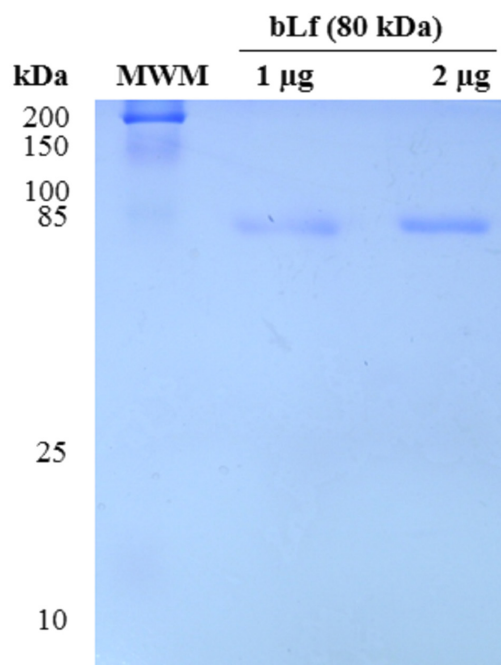

Supplement: Supplementary file 1 [file downloadSupplementary]
